# Supplementary material
Source: Springer Nature journal article supplement (https://www.springermedizin.de/resource/supplementary/13045_2013_311_MOESM1_ESM.pdf/9661098)

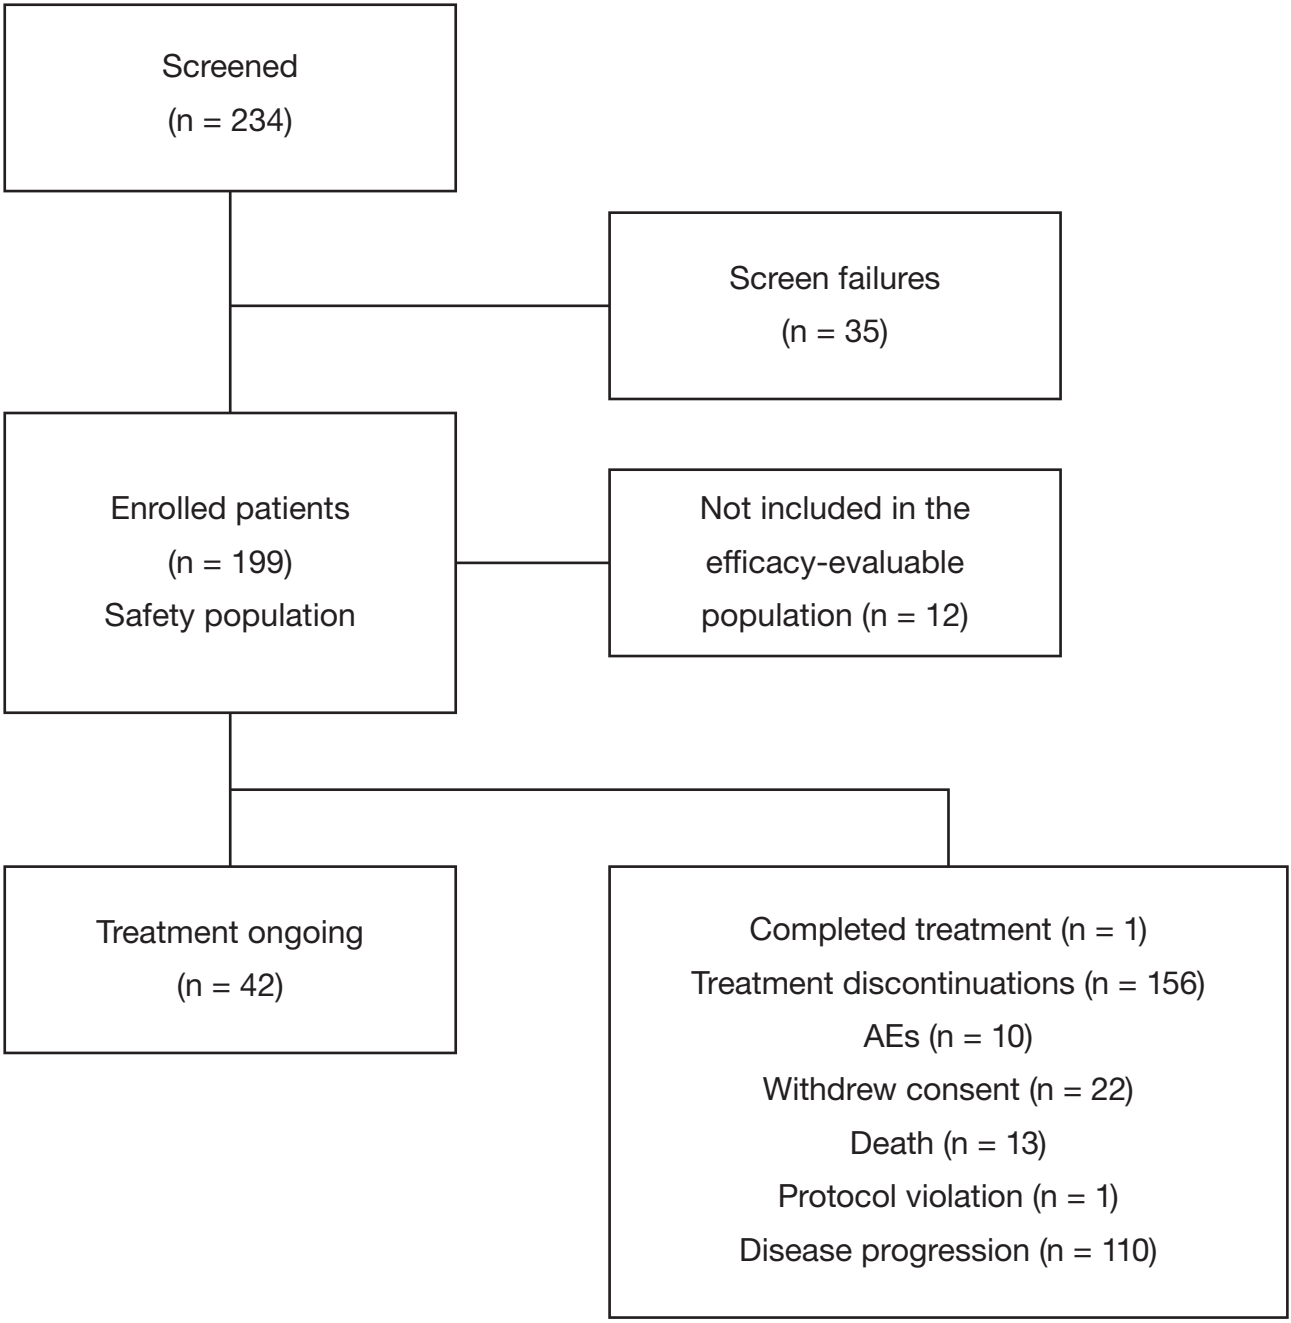

Supplement: MOESM1 [file 9661098]
